# Supplementary material for: Forecasting cell fate during antibiotic exposure using stochastic gene expression
Source: PubMed Central journal article supplement (PMC6624276; doi:10.1038/s42003-019-0509-0), 2019-07-11
Supplement: 42003_2019_509_MOESM2_ESM.pdf [file 42003_2019_509_MOESM2_ESM.pdf]

**Supplementary Movie 1: Single-cell death under carbenicillin exposure for  $P_{gadX}$ -*cfp*.**

- (A) Cell death over time. Red dot indicates particular point in time.
- (B) Example microscopy movie of cells expressing  $P_{gadX}$ -*cfp* reporter (cyan) under carbenicillin exposure. Cell death is indicated by propidium iodide staining (red).
- (C) Heatmap of cell death over time as a function of fluorescence at  $t = 0$ . White bar indicates particular point in time.
- (D) Image showing fluorescence of individual cells at  $t = 0$ . As cells die they are eliminated from the image. Note that brighter cells tend to survive longer than dim cells.
